# Supplementary material for: ΔFosB accumulation in hippocampal granule cells drives cFos pattern separation during spatial learning
Source: PubMed Central journal article supplement (PMC9606265; doi:10.1038/s41467-022-33947-w), 2022-10-26
Supplement: 41467_2022_33947_MOESM1_ESM.pdf [file 41467_2022_33947_MOESM1_ESM.pdf]

## $\Delta$ FosB accumulation in hippocampal granule cells drives cFos pattern separation during spatial learning

Paul J. Lamothe-Molina, Andreas Franzelin, Lennart Beck, Dong Li, Lea Auksutat, Tim Fieblinger, Laura Laprell, Joachim Alhbeck, Christine E. Gee, Matthias Kneussel, Andreas K. Engel, Claus C. Hilgetag, Fabio Morellini and Thomas G. Oertner

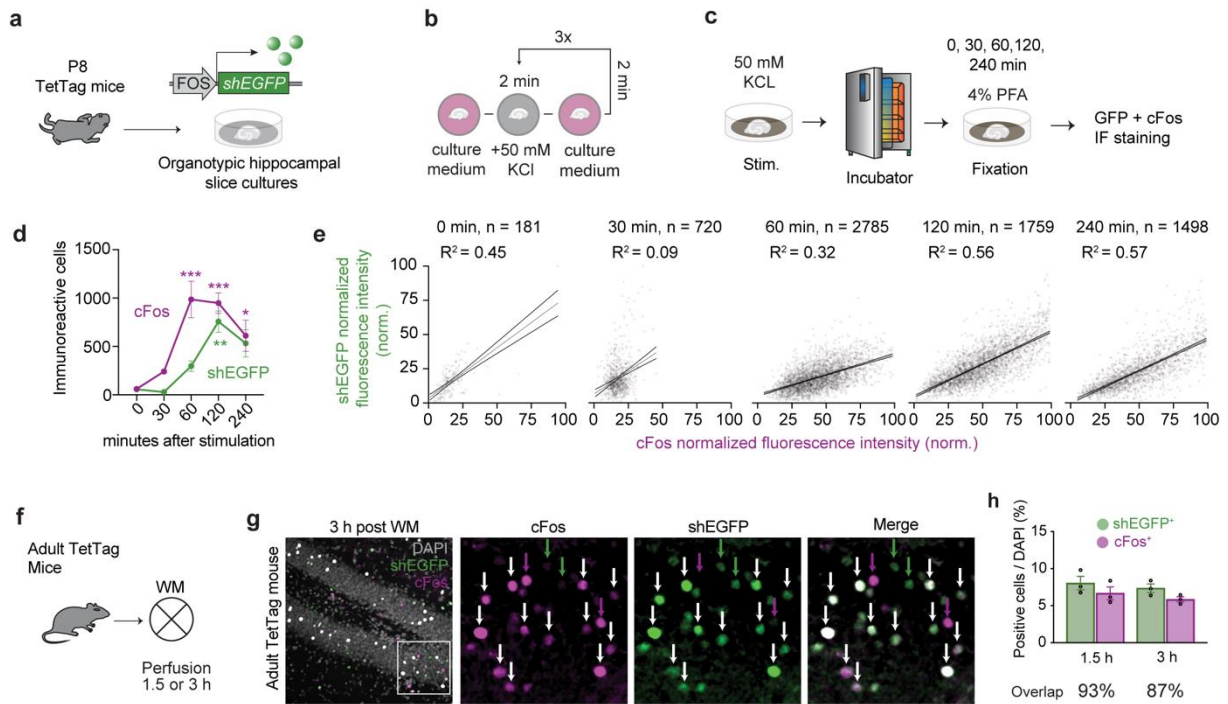

**Supplementary Figure 1. Characterization of cFos reporter expression in TetTag mice.** **a**, Hippocampal slice cultures were prepared from p8 TetTag mice in which *shEGFP* is expressed under the cFos promoter. **b**, cFos expression was induced by 50 mM potassium chloride (KCl) application. Slices were exposed to high KCl for 2 min, 3 times at 2 min intervals. **c**, Slices were returned to the incubator (37 °C) after stimulation and fixed with 4% paraformaldehyde (PFA) 0, 30, 60, 90, 120 or 240 min after the end of the stimulation. **d**, Time course of native cFos protein and shEGFP reporter expression. Immunoreactive (IR) cells were manually scored (shEGFP, n = 3 slices; cFos, n = 3 slices, mean ± SEM) inside the granule cell layer as determined by the DAPI signal. cFos<sup>+</sup> cells significantly increased after 60 min (\*\*\*\*p < 0.0001) while shEGFP<sup>+</sup> cells significantly increased after 120 min (\*\*p = 0.001) (two-way-ANOVA, Time Point x Protein interaction \*p = 0.048. Šídák's multiple comparisons test) **e**, Anti-cFos vs. anti-shEGFP fluorescence intensity, using automatic detection of cFos<sup>+</sup> cells (low detection threshold). High linear correlation was found 120 min and 240 min after stimulation. **f**, TetTag mice were trained in the WM to induce cFos and sacrificed 1.5 h or 3 h after the end of the last training session. **g**, Dentate gyrus from TetTag mouse stained against cFos (magenta) and shEGFP (green) 3 h after water maze (WM) training. Most fluorescent granule cells (GCs) are double-positive (white arrows). Magenta and green arrows correspond to cFos<sup>+</sup> or shEGFP<sup>+</sup> GCs, respectively. **h**, Fraction of positive cells and overlap of shEGFP reporter (green) and cFos protein (magenta) in animals sacrificed 1.5 h (n = 3 mice) and 3 h (n = 3 mice) after water maze training. Symbols correspond to individual animals, bars show mean ± SEM.

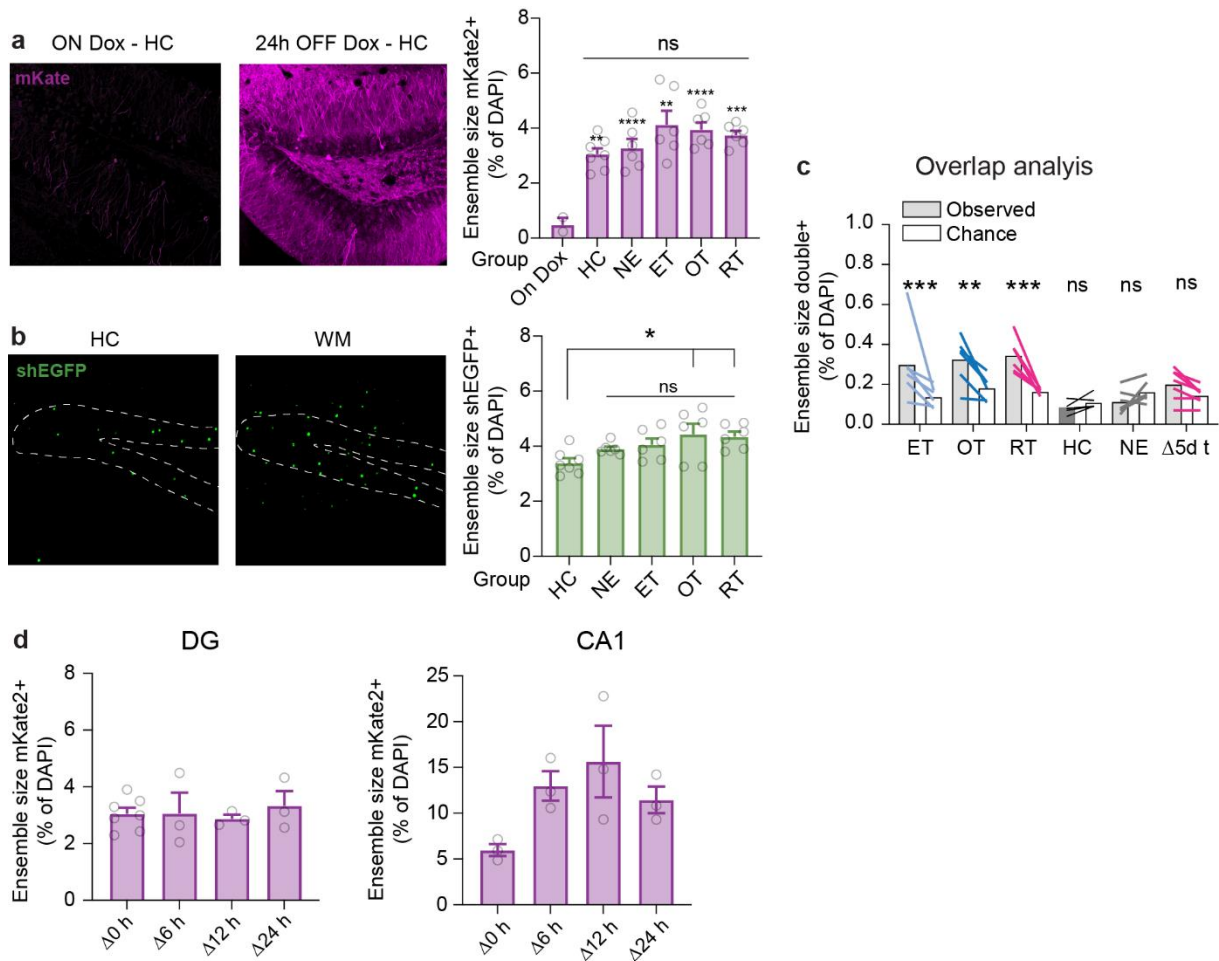

**Supplementary Figure 2. Size of cFos ensembles in TetTag mice.** **a**, Removal of Doxycycline food induced cFos-dependent expression (cFos-tagged) of membrane-targeted mKate2 in the home cage (HC). The fraction of mKate2-positive neurons was not different in home-caged animals compared to novel environment (NE) and mice trained in the water maze (early training ET; overtrained OT; reversal training RT, mean  $\pm$  SEM). All groups showed significantly larger cFos<sup>+</sup> ensemble sizes than mice on Dox (HC \*\*, n = 7; NE \*\*\*\*, n = 6; ET \*\*\*, n = 6; OT \*\*\*\*, n = 6; RT \*\*\*, n = 6. One-way-ANOVA, Sidak multiple comparison test). **b**, Nuclear shEGFP reports cFos-expression in the 2-3 hours before sacrifice. Ensemble size (mean  $\pm$  SEM) was significantly larger in the OT and RT groups compared to the HC group. Ensemble size was similar in all WM-trained groups (HC vs. OT \*, n = 6; HC vs. RT \*, n = 6; HC vs. NE ns, n = 6; HC vs. ET ns, n = 6. One-way-ANOVA, Sidak multiple comparison test). **c**, Observed (grey) and chance-level (white) overlap between mKate2 and shEGFP-tagged ensembles from different (Figs. 1, 2 and 5) experimental groups (HC ns, n = 7 (two sets of lines are overlapping); NE ns, n = 6; ET \*\*\*, n = 6; OT \*\*, n = 6; RT \*\*\*, n = 6; Δ5d ns. Two-way-ANOVA, Sidak's multiple comparison test). **d**, Ensemble size (mKate2, mean  $\pm$  SEM) in home caged mice sacrificed at different times after the end of a 24 h off-Dox period (see Fig. 5). Note delayed increase of mKate2-positive pyramidal cells in CA1.

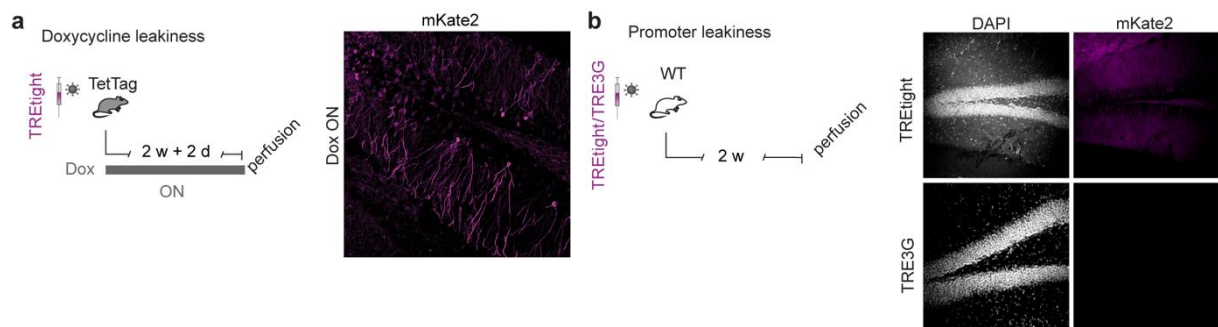

**Supplementary Figure 3. Optimization of cFos tagging in TetTag mice.** **a**, Doxycycline leakiness test. Mice were always ON Dox. They were injected with AAV9-TREtight-*iChloC-mKate2* bilaterally in DG and were always in their home cage (HC). Few mKate2-expressing granule cells (GCs) could be detected. **b**, Promoter leakiness test. Wild-type mice that do not express the tetracycline-transactivator (tTA) were injected with either TREtight or TRE3G-promoter region constructs using AAVs. Right: mKate2 expression was observed in TREtight, but not with TRE3G promoter.

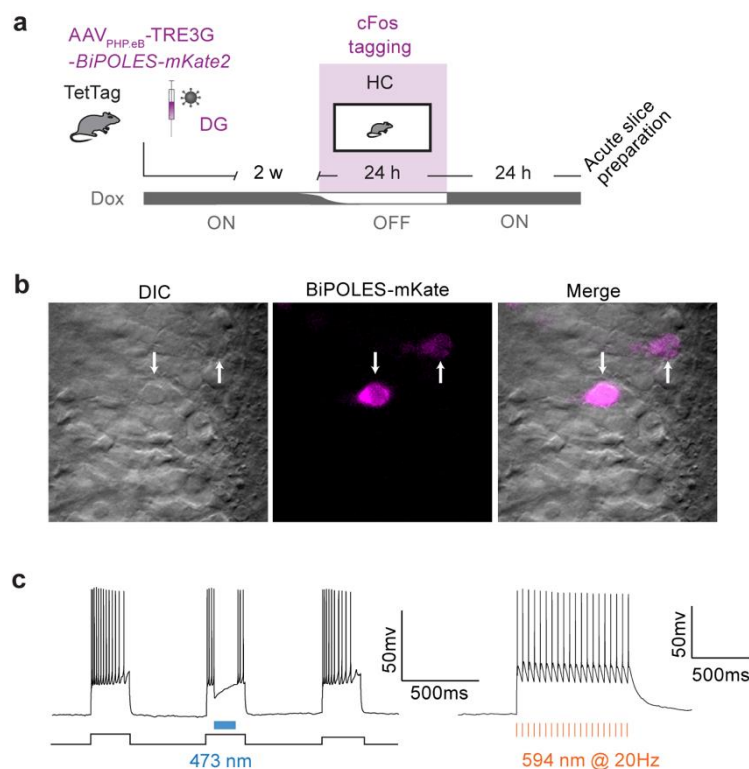

**Supplementary Figure 4. BiPOLES characterization in granule cells (GCs).** **a**, TetTag mice were injected with AAVPHP.eb-TRE3G-BiPOLES-mKate2. Mice were taken off Dox while they were in their home cage (HC). 24 h later, acute slices were prepared. **b**, Representative images showing the GC layer and BiPOLES-expressing cells. Left differential interference contrast (DIC) image, middle: fluorescent image showing mKate2 (arrows) in the soma of GCs, right: overlay. **c**, Whole cell patch-clamp recordings from BiPOLES-expressing GCs. 473 nm light prevents action potentials (APs) induced by somatic 150 pA (500 ms) current injection. 594 nm light pulses reliably elicit APs.

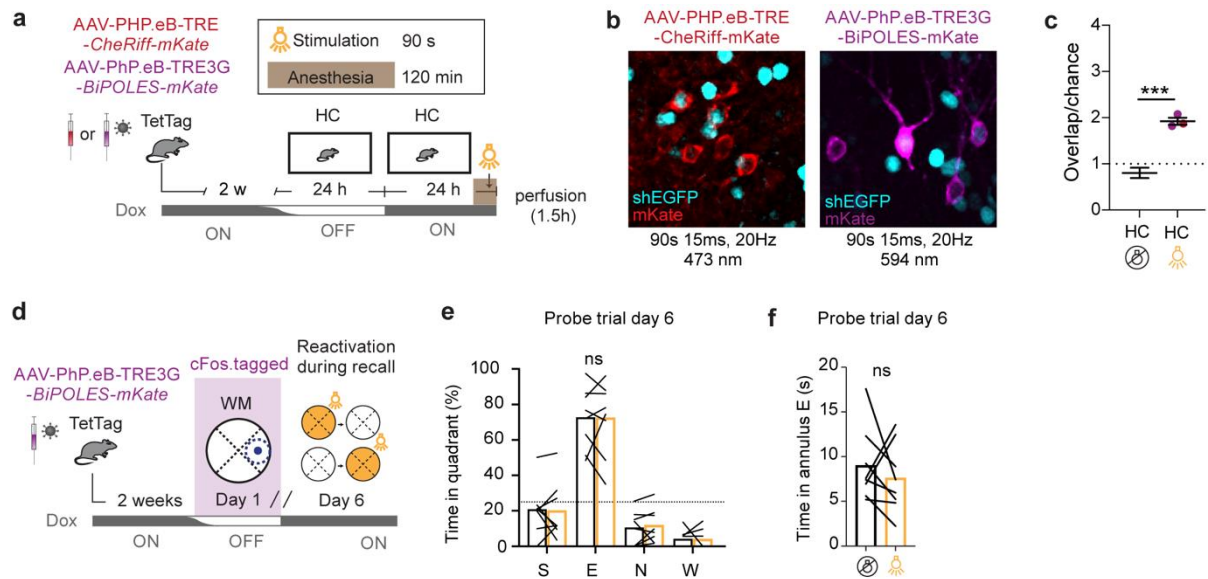

**Supplementary Figure 5. Effect of optogenetic reactivation of cFos-tagged GCs on spatial memory recall.** **a**, Testing the effect of optogenetic depolarization in home-caged (HC) mice. Mice were taken off Dox for 24 h to express the optogenetic construct in cFos<sup>+</sup> cells. Two different channelrhodopsins were tested, CheRiff (red) and Chrimson (magenta), the depolarizing actuator in the BiPOLES construct. Animals were light-stimulated under anesthesia (473 nm for CheRiff, 594 nm for BiPOLES) and sacrificed 1.5 h later. **b, c**, Light stimulation increased the overlap between the first set of cFos<sup>+</sup> neurons (red/magenta) and shEGFP expression (cyan). Lines show mean  $\pm$  SEM. The difference to unstimulated mice expressing mKate (HC group from Fig. 2) was significant ( $***p = 0.0003$ , two-sided, unpaired t test). **d**, Testing the effect of optogenetic reactivation of the cFos ensemble tagged on day 1 of WM training. All mice had two probe trials on day 6, one of which was performed under reactivation conditions (594 nm light pulses at 20 Hz). **e**, On day 6, performance in probe trials with optogenetic reactivation (orange bars) was not different from trials without reactivation (black bars) (ns,  $p > 0.99$ , matched two-way-ANOVA with Šidák's multiple comparisons test). **f**, Time spent in target (E) annulus was also not affected in trials with optogenetic reactivation (orange bar) (ns,  $p = 0.49$ , two-sided paired t test).

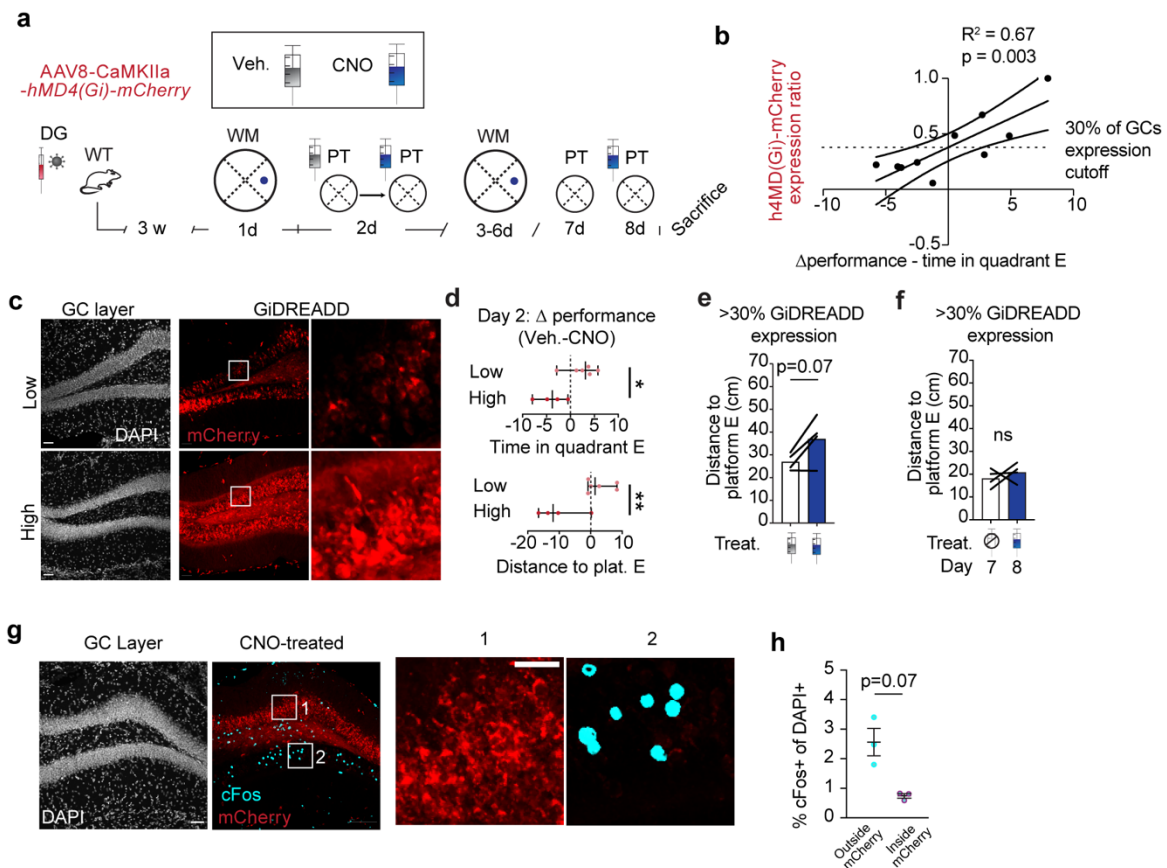

**Supplementary Figure 6. Chemogenetic silencing of dentate gyrus affects spatial memory recall.** **a**, Experimental design. Wild-type (WT) mice were injected with AAV<sub>8</sub>-CaMKIIa-*hMD4(Gi)-mCherry* bilaterally in DG (n = 10 mice). 3 weeks after injection, mice were trained in the water maze (WM) on day 1. On day 2, mice were tested for reference memory with two probe trials (PT, no platform). All mice were injected with 0.9% NaCl (vehicle) before the first PT and then with clozapine-N-oxide (CNO, 5 mg/kg) before the second PT. Both injections were done intraperitoneally (i.p.) 40 min before each PT. Mice were trained further and tested again on day 7 for reference memory at the end of that session (no treatment) and on the following day (day 8) 40 min after CNO injection (without further training). Mice were sacrificed in different batches on different days with/without CNO application for immunohistochemistry. **b**, Expression of chemogenetic silencing receptors (*hMD4(Gi)-mCherry*) in DG strongly correlates with performance difference (with/without CNO) on day 2. For each mouse, we calculated the difference of time spent in quadrant E after CNO injection vs vehicle injection ( $\Delta$  time) as a performance measure, with positive values indicating CNO-induced decrease in performance. **c**, Representative confocal images showing *hMD4(Gi)-mCherry* expression in DG. Upper row: low Gi-DREADD-expressing mouse; lower row: high Gi-DREADD-expressing mouse. Left, DAPI. Middle, mCherry. Right, magnification from GCs expressing mCherry in the upper blade of the DG. Mice were separated into two groups based on their mCherry expression ratio: high > 0.5 (n = 4), low < 0.5 (n = 6). **d**, Mice in the low expression group are unaffected or show better performance on the second PT, while mice in the high expression group perform worse (Markers: individual mice; Lines: median  $\pm$  min/max; Distance to platform E: \*p = 0.01; Time in quadrant E: \*\*p = 0.007; two-sided unpaired t-test). **e**, Performance was worse during chemogenetic silencing in the high expression group, however, not statistically significant (ns p = 0.07, two-sided paired t-test). **f**, Spatial memory recall is not affected in expert mice. **g**, Example from a mouse where only the upper blade of DG was transduced with Gi-DREADD (red). No cFos expression (cyan) in granule cells of the upper blade (1), but strong cFos expression in GCs of the lower blade (2). This mouse received CNO before a PT and was sacrificed 1.5 h after. **h**, Data from three mice with uneven Gi-DREADD expression, comparing cFos expression outside and inside the (mCherry-labeled) Gi-DREADD expression area (mean  $\pm$  SEM, two-sided paired t test).



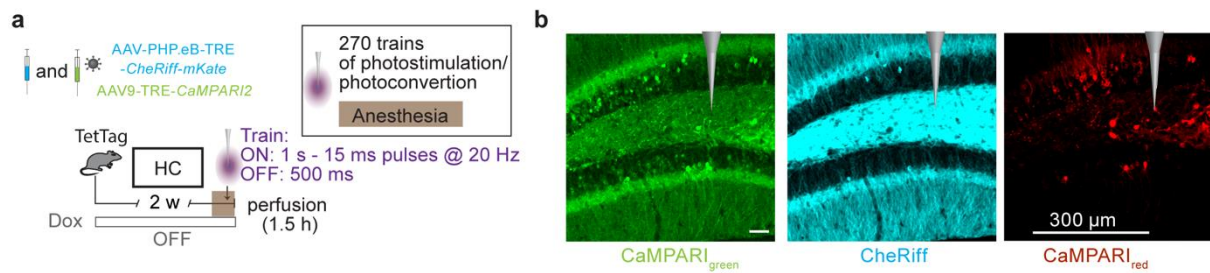

**Supplementary Figure 7. Estimating the radius of photoconversion by coexpression of CaMPARI and channelrhodopsin.** **a** Mice were injected a mix of two AAVs encoding CaMPARI2 and CheRiff, respectively. After 2 weeks, mice were anesthetized and stimulated with violet light through a tapered fiber positioned in the hilus, which depolarized the cells and photoconverted calcium-bound CaMPARI. **b** Immunohistochemistry of DG showed photoconverted neurons up to 300 μm away from the fiber tip (red). Based on these calibration experiments, we evaluated neurons within a 200 μm radius around the fiber tip in the behavioral experiments (Fig. 4).

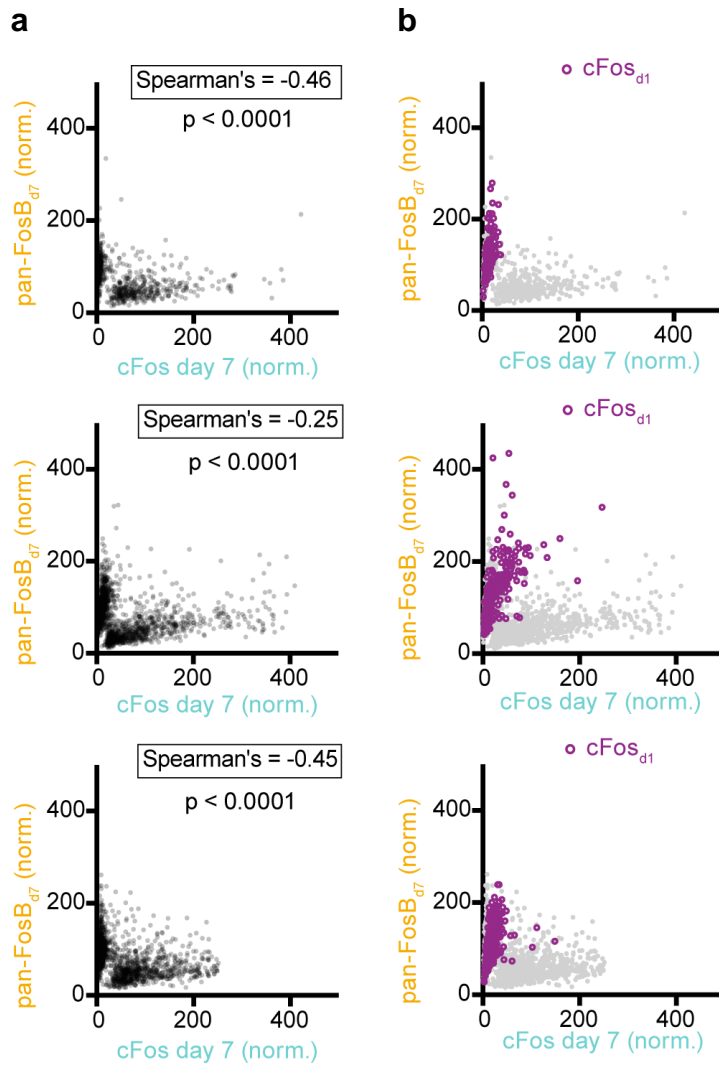

**Supplementary Figure 8. Expression analysis in DG in individual mice.** **a** Inverse correlation between cFos expression levels and FosB/ $\Delta$ FosB on day 7 of WM training. **b** cFos-expressing neurons from day 1 (magenta) typically expressed FosB/ $\Delta$ FosB, but rarely cFos on day 7.

These data are presented as pooled plots in main Fig. 6b and d.

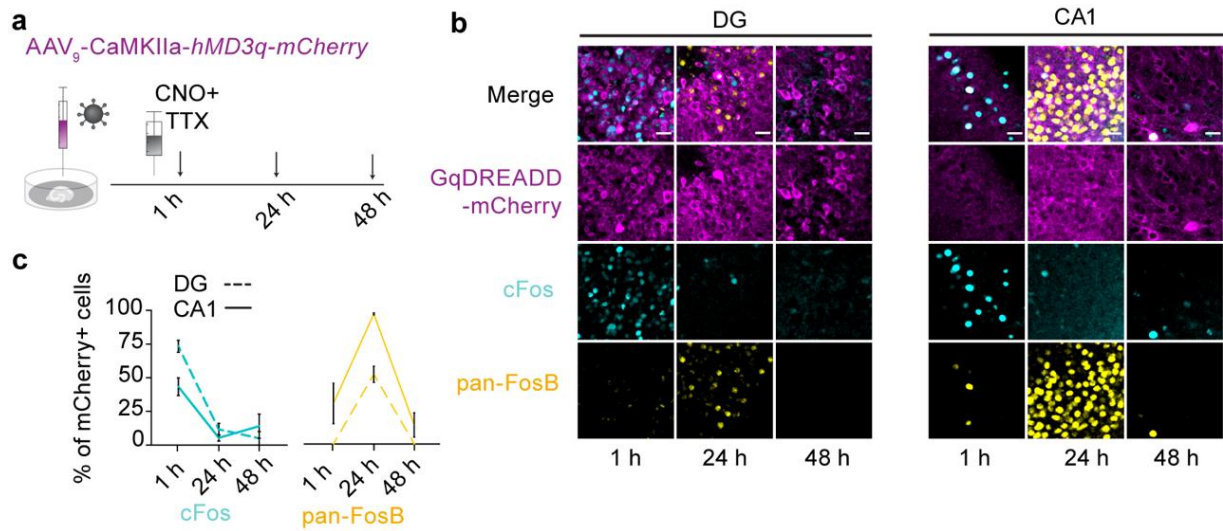

**Supplementary Figure 9. Chemogenetic activation of cFos and pan FosB.** **a** Hippocampal slice cultures were transduced with AAV8-CaMKIIa-*GqDREADD-mCherry*. Cultures were silenced with TTX, stimulated with CNO and fixed at 3 different time points. **b** Cultures were immunostained for cFos and pan-FosB. **c** cFos expression was strongly induced by CNO, but rapidly dropped to very low levels after 24 h in both DG and CA1 (mean +/- SEM). Pan-FosB immunoreactivity peaked after 24 h, with a higher fraction of CA1 neurons expressing FosB compared to DG. After 48 h, expression was down in both CA1 and DG.



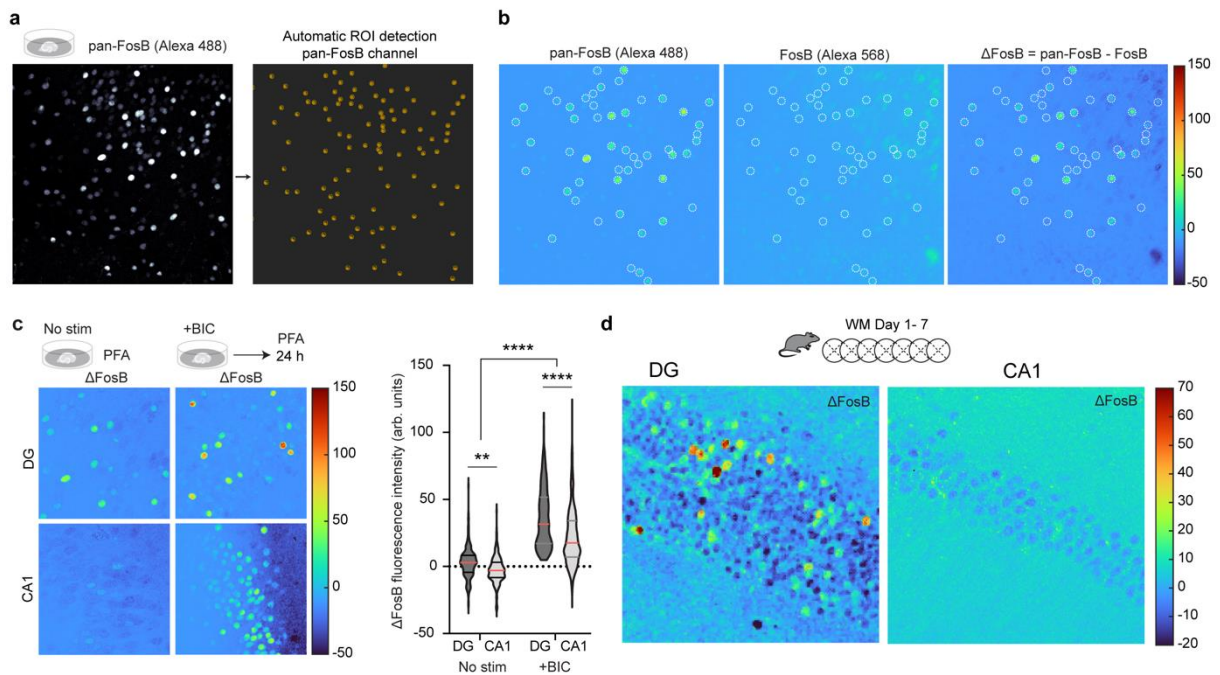

**Supplementary Figure 10. Subtraction method to estimate  $\Delta$ FosB expression.** **a**, Example of an image (3D rendering from stack, Imaris) showing pan-FosB immunoreactive cells in the dentate gyrus (DG) from an organotypic rat slice culture taken at baseline without stimulation. An automated ROI selection was used to place spots (Imaris) on Pan-FosB immunoreactive cells. **b**, Same example image presented with Jet color look-up-table to represent fluorescence intensity of pan-FosB and FosB. Whole image fluorescence subtraction performed in Matlab allowing signed pixel values: pan-FosB channel – FosB channel =  $\Delta$ FosB. White dotted-line circles are placed to indicate the ROIs based on the Pan-FosB immunoreactive cells (placed manually on a single plane so not all spots from **a** appear in this image). **c**, Exemplary single plane images of DG and CA1 of organotypic slice cultures showing  $\Delta$ FosB levels without stimulation (baseline) and 24 h after bicuculine (BIC) stimulation. Violin plots (range, median  $\pm$  quartiles):  $\Delta$ FosB intensities in defined ROIs (Imaris) are significantly higher in DG than in CA1 at baseline (\*\*  $p = 0.006$ , DG:  $n = 228$  cells, 3 slices; CA1:  $n = 298$  cells, 3 slices, two-way-ANOVA) and 24 h after BIC stimulation (\*\*\*\*  $p < 0.0001$ , DG:  $n = 435$  cells, 3 slices; CA1:  $n = 459$  cells, 3 slices, two-way-ANOVA). **d**, Fluorescence subtraction method applied to brain slices from a mouse that was trained for 7 days in the water maze (WM). Image showing accumulation of  $\Delta$ FosB in granule cells of the DG but not in pyramidal cells of the CA1 region. Complete statistics in Supplementary Table 1.

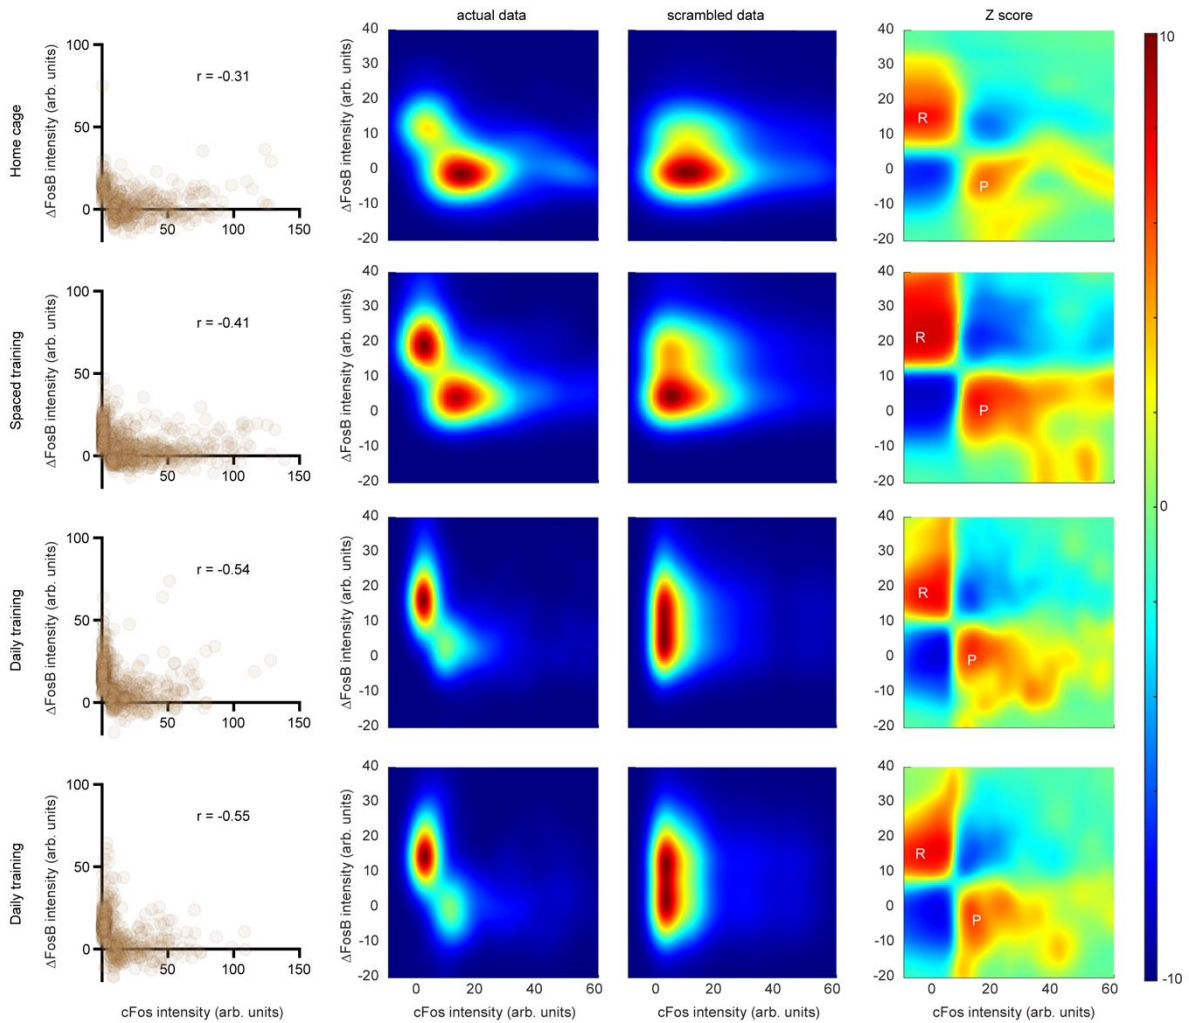

**Supplementary Figure 11. Kernel density estimates in DG, more examples.** Single cell analysis of cFos and  $\Delta\text{FosB}$  expression in DG after 3 different training regimes. Each row shows data from one mouse (Home cage, spaced training, daily training, daily training). **First column:** Expression of cFos and  $\Delta\text{FosB}$  in individual granule cells (brown circles). Spearman's  $r$  indicates inverse correlation. **Second column:** Kernel density estimate from actual single cell data (first column). **Third column:** Kernel density estimate, average of 100 randomized (scrambled) combinations of the actual data. **Fourth column:** Pixel-wise Z-score of actual data compared to scrambled data, scaled from -10 to +10. In every animal, we found two regions of overrepresented cells (positive Z-scores): Low cFos - high  $\Delta\text{FosB}$  (R, repressed) and high cFos - low  $\Delta\text{FosB}$  (P, permissive). In the homecage, most GC are in the permissive state. Spaced training resulted in a bimodal distribution. Daily training shifted the majority of GC to the repressed state.

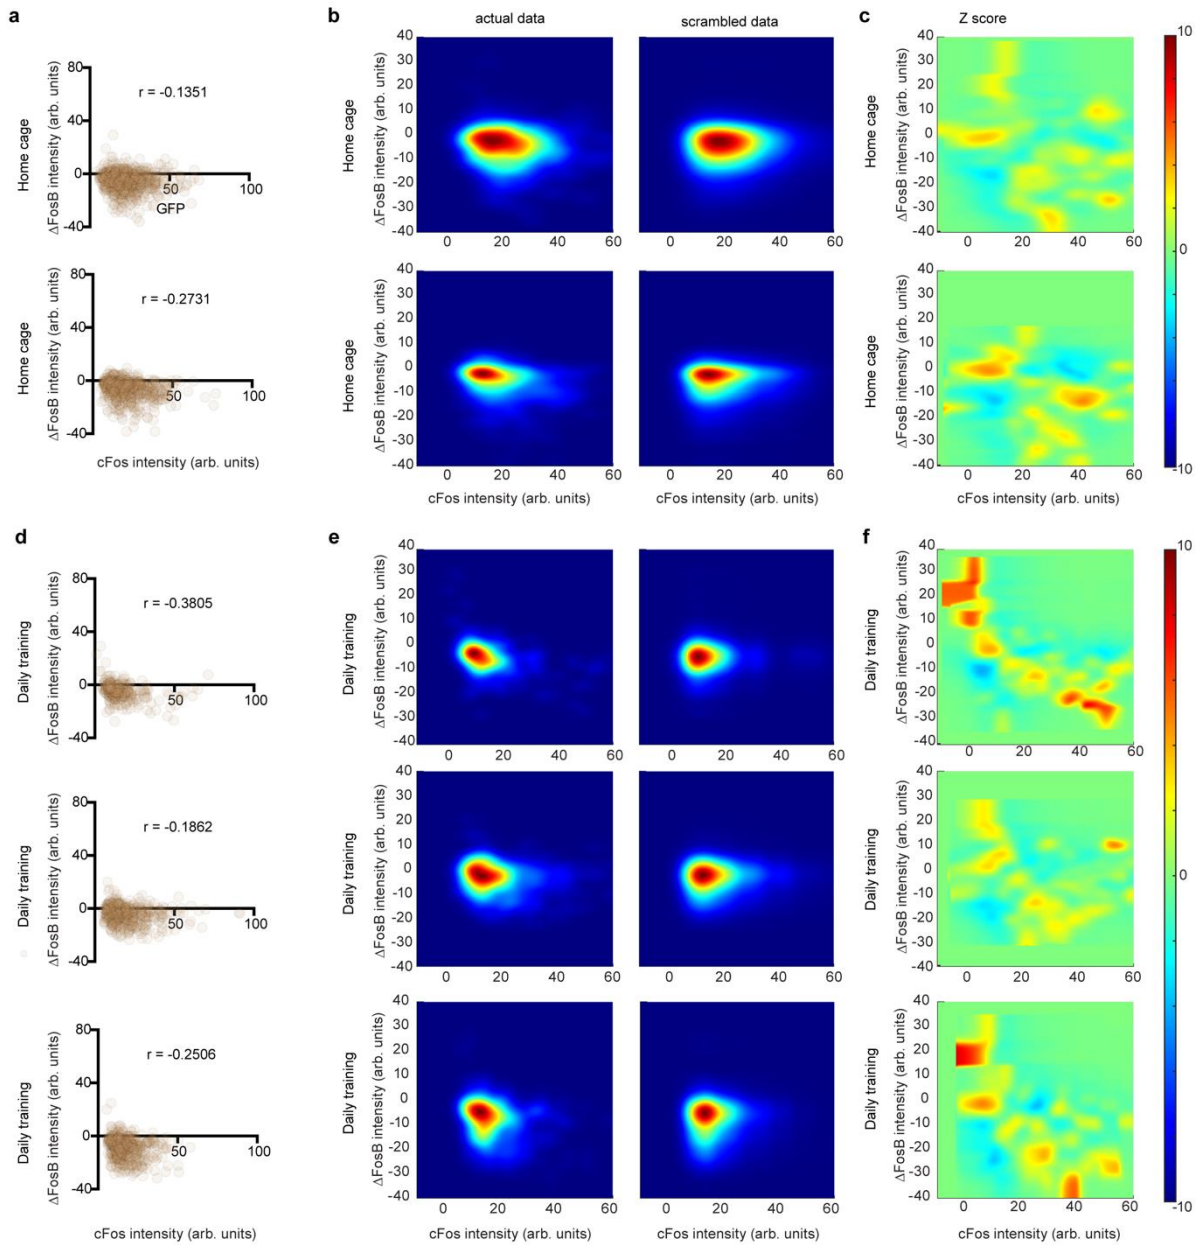

**Supplementary Figure 12. Kernel density estimates from CA1 pyramidal cells.** **a**, Two mice were kept in the homecage for 7 days. Expression of cFos and  $\Delta$ FosB in individual CA1 cells (brown circles). Spearman's  $r$  indicates weak inverse correlation. **b**, Kernel density estimate from actual single cell data (first column) and average of 100 randomized (scrambled) combinations of the actual data. **c**: Pixel-wise Z-score of actual data compared to scrambled data, scaled from -10 to +10. **d**, Three mice were trained daily in the water maze for 7 days. Expression of cFos and  $\Delta$ FosB in individual CA1 cells (brown circles). Spearman's  $r$  indicates inverse correlation. **e**, Kernel density estimate from actual single cell data (first column) and average of 100 randomized (scrambled) combinations of the actual data. **f**, Pixel-wise Z-score of actual data compared to scrambled data, scaled from -10 to +10. The actual distributions are similar to the scrambled distributions even after 7 days of WM training.

**Supplementary Table 1**

| Figure | Panel | Groups                        | n                                                                   | # replications                                             | Test                                                                                                                                         | Multiple comparison                                                                                                                                                                                                                            |
|--------|-------|-------------------------------|---------------------------------------------------------------------|------------------------------------------------------------|----------------------------------------------------------------------------------------------------------------------------------------------|------------------------------------------------------------------------------------------------------------------------------------------------------------------------------------------------------------------------------------------------|
| 1      | c     | ET (days 1-2) + OT (days 1-6) | 12 mice (6 per group)                                               | Pooled data from 4 different batches of mice               | Mixed model ANOVA. Training (Days) fixed effect: *** p=0.0007                                                                                | Sidak (Day 1 vs. 2, * p=0.02; day 5 vs. 6 p>0.98)                                                                                                                                                                                              |
| 1      | f     | ET                            | 6 mice                                                              | Pooled data from 4 different batches of mice               | Matched, Two-way-ANOVA. Annulus effect: F (1, 5) = 28.68, p=0.0031. Annulus x Tagging Day interaction: F (1, 5) = 4.31, ns p=0.0925          | Sidak (Day 1, annulus E vs. W, * p=0.03; Day 2 annulus E vs. W, ** p=0.0001                                                                                                                                                                    |
| 1      | h     | OT                            | 6 mice                                                              | Pooled data from 4 different batches of mice               | Matched, Two-way-ANOVA. Annulus effect: F (1, 5) = 36.91, p=0.0017. Annulus x Tagging Day interaction: F (1, 5) = 1.72, ns p=0.24            | Sidak (Day 5, annulus E vs. W, **** p<0.0001; Day 6 annulus E vs. W, ** p<0.0001                                                                                                                                                               |
| 1      | i     | ET and OT                     | 6 mice per group                                                    | Pooled data from 4 different batches of mice               | Mixed, Two-way-ANOVA. Group: F (1, 10) = 48.77, **** p<0.0001. Group x Tagging Day (learning) interaction: F (1, 10) = 5.28, * p=0.04        | Sidak (ET group: day 1 vs. 2, distance to platform E, ** p=0.004; Group OT day 5 vs. 6 distance to platform E, ns p=0.65.                                                                                                                      |
| 1      | k     | ET and OT                     | 6 mice per group                                                    | Pooled data from 4 different batches of mice               | From SF 3                                                                                                                                    | From SF 3                                                                                                                                                                                                                                      |
| 1/2    | k/f   | ET and OT / RT, NE and HC     | 6 mice per group                                                    | Pooled data from 4 different batches of mice               | Ordinary one-way-ANOVA. Group: F (4, 26) = 9.567, **** p<0.0001                                                                              | Sidak (HC vs. NE: ns p>0.99; HC vs. ET: ** p=0.002; HC vs. OT: * p=0.01; ; HC vs. RT: ** p=0.024; NE vs. ET: ** p=0.03; NE vs. OT: * p=0.02; NE vs. RT: ** p=0.29; ET vs. OT: ns p=0.99; ET vs. RT: ns p>0.99; OT vs. RT: ns p=0.98            |
| 2      | b     | RT                            | 6 mice                                                              | Pooled data from 4 different batches of mice               | Matched, Two-way-ANOVA. Annulus effect: F (1, 5) = 54.68, **** p=0.0007. Annulus x Tagging day interaction: F (1, 5) = 7.49, * p=0.04        | Sidak (Day 5, annulus E vs. W, * p=0.01; Day 6 annulus E vs. W, ns p=0.75                                                                                                                                                                      |
| 2      | d     | NE                            | 6 mice                                                              | Pooled data from 4 different batches of mice               | Two-sided paired t test. Annulus E vs. W, ns, p=0.16. CI -3.313 to 15.02                                                                     | NA                                                                                                                                                                                                                                             |
| 2      | f, g  | ET, OT, RT, NE, HC            | n=1815, 2209, 2524, 1531, 1575 cells                                | Pooled data from 4 different batches of mice               | Ordinary two-way-ANOVA. Group effect: F(4, 40) = 13.19, **** p<0.0001                                                                        | Sidak (HC vs. ET: ****, p<0.0001; HC vs. OT: *** p=0.0003; HC vs. RT: ** p=0.001; ; HC vs. NE: ns p=0.75; ET vs. OT: ns p=0.6; ET vs. RT: ns p=0.26; ET vs. NE: *** p=0.0002; OT vs. RT: ns p>0.99; OT vs. NE: * p=0.03; RT vs. NE: ns p=0.11) |
| 3      | b     | Optogenetic silencing group   | 15 mice                                                             | Pooled data from 2 different batches of mice               | Repaired measures one-way-ANOVA. Training (days) effect: F (2, 9, 41), **** p<0.0001                                                         | Sidak (Escape latency compared to first training day, Day 2, **** p=0.0008; day 3, *** p=0.0006, day 4, *** p=0.0002; Day 5, **** p<0.0001                                                                                                     |
| 3      | c     | Tethered vs. Untethered       | 15 mice                                                             | Data from 2 different batches                              | Two-sided paired t test. Tethered vs. Untethered trials (Day 5) ns p=0.12                                                                    | NA                                                                                                                                                                                                                                             |
| 3      | d     | 473nm Light vs. No Light      | 15 mice                                                             | Data from 2 different batches                              | Two-sided paired t test. 473nm Light vs. No Light trials (Day 5) ns p=0.5                                                                    | NA                                                                                                                                                                                                                                             |
| 3      | d     | 594nm Light vs. No Light      | 8 mice                                                              | 1 batch of mice                                            | Two-sided paired t test. 594nm Light vs. No Light trials (Day 5) ns p=0.74                                                                   | NA                                                                                                                                                                                                                                             |
| 3      | g     | 473nm Light vs. No Light      | 8 mice (1 mouse excluded)                                           | 1 batch of mice                                            | Matched two-way-ANOVA. Quadrant effect: F (3, 18) = 14.91, **** p<0.0001. 473nm Light x Quadrant interaction: F (1, 6) = 0.026, ns p=0.12    | Sidak (Time in Quadrant, 473nm Light vs. No Light: South ns p=0.41; East ns p=0.35; North ns p=0.95, West ns p=0.92)                                                                                                                           |
| 3      | h     | 473nm Light vs. No Light      | 15 mice (3 mice excluded)                                           | Data from 2 different batches of mice (dotted/solid lines) | Matched two-way-ANOVA. Quadrant effect: F (3, 33) = 68.41, **** p<0.0001. 473nm Light x Quadrant interaction: F (3, 33) = 6.93, *** p=0.001. | Sidak (Time in Quadrant, 473nm Light vs. No Light: South ns p=0.42; East ** p=0.002; North ns p=0.1, West ns p=0.99)                                                                                                                           |
| 3      | i     | 473nm Light vs. No Light      | 15 mice (4 mice excluded). Day 2 (n=8), Day 3 (n=7), & Day 5 (n=11) | Data from 2 different batches of mice (dotted/solid lines) | Two-sided paired t test. 473nm Light vs. No Light trials. Day 2: ns p=0.67; Day 3: ** p=0.004; Day 5: ** p=0.002                             | NA                                                                                                                                                                                                                                             |
| 5      | c     | Δ5d RT vs. Δ1d RT             | Δ5d RT (n= 7 mice) Δ1d RT (n= 6 mice from Fig 2)                    | Pooled data from 2 different batches of mice               | Two-sided unpaired t test. Δ5d RT vs. Δ1d RT overlap/chance. ** p=0.003                                                                      | NA                                                                                                                                                                                                                                             |
| 5      | g     | DG: Δ0h, Δ6h, Δ12h, Δ24h      | 3 mice per group                                                    | Pooled data from 3 different batches of mice               | Ordinary one-way-ANOVA. Group effect: F (3, 8) = 127, **** p<0.0001                                                                          | Sidak (Δ0h vs Δ6h ** p=0.005; Δ0h vs. Δ12h **** p<0.0001, Δ0h vs., Δ24h **** p<0.0001, , Δ6h vs. Δ12h *** p=0.0005, Δ6h vs. Δ24h **** p<0.0001, Δ12h vs. Δ24h *** p=0.002)                                                                     |

Supplementary Table 1 (cont.)

| Figure | Panel   | Groups                                                    | n                                                                       | # replications                               | Test                                                                                                                                             | Multiple comparison                                                                                                                                                                                                                                                                                                                                              |
|--------|---------|-----------------------------------------------------------|-------------------------------------------------------------------------|----------------------------------------------|--------------------------------------------------------------------------------------------------------------------------------------------------|------------------------------------------------------------------------------------------------------------------------------------------------------------------------------------------------------------------------------------------------------------------------------------------------------------------------------------------------------------------|
| 5      | g       | CA1: Δ0h, Δ6h, Δ12h, Δ24h                                 | 3 mice per group                                                        | Pooled data from 3 different batches of mice | Ordinary one-way-ANOVA. Group effect: F (3, 8) = 31.24, **** p<0.0001                                                                            | Sidak (Δ0h vs Δ6h, Δ0h vs Δ12h, Δ0h vs Δ24h, Δ6h vs Δ12h, Δ6h vs Δ24h, Δ12h vs Δ24h) ns p=0.99                                                                                                                                                                                                                                                                   |
| 6      | b       | Δ7d OT                                                    | 6 mice                                                                  | Data from 1 batch of mice                    | Spearman r = -0.36; CI: -0.3904 to -0.3358, **** p < 0.0001                                                                                      | NA                                                                                                                                                                                                                                                                                                                                                               |
| 6      | e       | Δ7d OT                                                    | 6 mice                                                                  | Data from 1 batch of mice                    | Two-sided paired t test. Observed vs. Expected Overlap, ** p=0.002                                                                               | NA                                                                                                                                                                                                                                                                                                                                                               |
| 6      | f       | Δ7d OT                                                    | 6 mice                                                                  | Data from 1 batch of mice                    | Two-sided paired t test. Observed vs. Expected Overlap, *** p=0.0004                                                                             | NA                                                                                                                                                                                                                                                                                                                                                               |
| 7      | a upper | NT, Veh., 1st CNO, 2nd CNO                                | NT (7 slices), Veh. (5 slices), 1st CNO (9 slices), 2nd CNO (14 slices) | Pooled data from 3 replications              | Ordinary one-way-ANOVA, Group effect: F(3, 31) = 10.57, **** p<0.0001                                                                            | Sidak (NT vs. Veh.: ns p>0.99; NT vs. 1st CNO: *** p=0.0003; NT vs. 2nd CNO: ns p=0.88; Veh. vs. 1st CNO: *** p=0.0006; Veh. vs. 2nd CNO ns p=0.81; 1st CNO vs. 2nd CNO: *** p=0.0008)                                                                                                                                                                           |
| 7      | a lower | NT, Veh., 1st CNO, 2nd CNO                                | NT (7 slices), Veh. (5 slices), 1st CNO (9 slices), 2nd CNO (14 slices) | Pooled data from 3 replications              | Ordinary one-way-ANOVA, Group effect: F(3, 31) = 6.32, ** p=0.0036                                                                               | Sidak (NT vs. Veh.: ns p>0.99; NT vs. 1st CNO: ns p=0.63; NT vs. 2nd CNO: * p=0.02; Veh. vs. 1st CNO: ns p=0.77; Veh. vs. 2nd CNO * p=0.003; 1st CNO vs. 2nd CNO: ns p=0.99)                                                                                                                                                                                     |
| 7      | b upper | NT, Veh., 1st CNO, 2nd CNO                                | NT (7 slices), Veh. (5 slices), 1st CNO (9 slices), 2nd CNO (14 slices) | Pooled data from 3 replications              | Ordinary one-way-ANOVA, Group effect: F(3, 31) = 13.70, **** p<0.0001                                                                            | Sidak (NT vs. Veh.: ns p>0.99; NT vs. 1st CNO: ** p=0.0069; NT vs. 2nd CNO: **** p<0.0001; Veh. vs. 1st CNO: ** p=0.0067; Veh. vs. 2nd CNO *** p=0.0002; 1st CNO vs. 2nd CNO: ns p=0.73)                                                                                                                                                                         |
| 7      | b lower | NT, Veh., 1st CNO, 2nd CNO                                | NT (7 slices), Veh. (5 slices), 1st CNO (9 slices), 2nd CNO (14 slices) | Pooled data from 3 replications              | Ordinary one-way-ANOVA, Group effect: F(3, 31) = 38.52, **** p<0.0001                                                                            | Sidak (NT vs. Veh.: ns p=0.97; NT vs. 1st CNO: ns p=0.98; NT vs. 2nd CNO: **** p<0.0001; Veh. vs. 1st CNO: ns p=0.87; Veh. vs. 2nd CNO **** p<0.0001; 1st CNO vs. 2nd CNO: **** p<0.0001)                                                                                                                                                                        |
| 8      | b       | Home cage (HC), Spaced Training (ST), Daily Training (DT) | HC (n = 2), ST (n = 2), DT (n = 3)                                      | Data from 1 batch of mice                    | Kruskal-Wallis test, **** p < 0.0001                                                                                                             | Multiple Dunn's comparison test. HC vs. ST: **** p < 0.0001; HC vs. DT: **** p < 0.0001; ST vs. DT: ** p = 0.0094.                                                                                                                                                                                                                                               |
| 8      | c       | HC                                                        | 1 mouse (example)                                                       | replicate in Supp. Fig. 11                   | Spearman r = -0.14, CI: -0.2284 to -0.05460, ** p = 0.0011                                                                                       | NA                                                                                                                                                                                                                                                                                                                                                               |
| 8      | c       | ST                                                        | 1 mouse (example)                                                       | replicate in Supp. Fig. 11                   | Spearman r = -0.44, CI: -0.4931 to -0.3944, **** p < 0.0001                                                                                      | NA                                                                                                                                                                                                                                                                                                                                                               |
| 8      | c       | DT                                                        | 1 mouse (example)                                                       | replicate in Supp. Fig. 11                   | Spearman r = -0.55, CI: -0.6054 to -0.4969, **** p < 0.0001                                                                                      | NA                                                                                                                                                                                                                                                                                                                                                               |
| SF 1   | d       | cFos and shEGFP                                           | 3 slices per time point per group                                       | Data from 1 batch of slices                  | Matched two-way-ANOVA. Time Point effect: F (4, 16) = 19.74, **** p<0.0001. Time Point x Protein interaction: F (4, 16) = 3.02, * p=0.048        | Sidak (cFos expression compared to baseline (0 min): 30 min ns p=0.69; 60 min **** p<0.0001; 120 min **** p=0.0001; 240 min ** p=0.0009) (shEGFP expression compared to baseline (0 min): 30 min ns p=0.99; 60 min ns p=0.44; 120 min ** p=0.001; 240 min * p=0.02)                                                                                              |
| SF 1   | e       | 0, 30, 60, 120, 240 mins                                  | n=181, 720, 2785, 1759, 1498 cells                                      | Data from 1 batch of slices                  | Simple linear regression. R <sup>2</sup> = 0.45, 0.09, 0.32, 0.56, 0.57                                                                          | NA                                                                                                                                                                                                                                                                                                                                                               |
| SF 2   | a       | On-Dox, HC, NE, ET, OT, RT                                | On-Dox (n=2), HC (n=7), NE, ET, OT, RT (n=6 per group)                  | Pooled data from 4 different batches of mice | Ordinary one-way-ANOVA. Group effect: F (5, 25) = 8.04, **** p<0.0001                                                                            | Sidak (On-Dox vs. HC ** p=0.004, On-Dox vs. NE **** p>0.0001, On-Dox vs. ET ** p=0.001, On-Dox vs. OT *** p=0.0001, On-Dox vs. RT *** p=0.0003, HC vs. NE ns p=0.23, HC vs. ET ns p>0.99, HC vs. OT ns p=0.49, HC vs. RT ns p=0.84, NE vs. ET ns p=0.64, NE vs. OT ns p>0.99, NE vs. RT ns p=0.99; ET vs. OT ns p=0.9, ET vs. RT ns p=0.99, OT vs. RT ns p>0.99) |
| SF 2   | b       | HC, NE, ET, OT, RT                                        | HC (n=7), NE, ET, OT, RT (n=6 per group)                                | Pooled data from 4 different batches of mice | Ordinary one-way-ANOVA. Group effect: F (4, 26) = 3.41, * p=0.027                                                                                | Sidak, HC vs. NE ns p=0.52, HC vs. ET ns p>0.26, HC vs. OT * p=0.02, HC vs. RT * p=0.04, NE vs. ET ns p=0.98, NE vs. OT ns p=0.5, NE vs. RT ns p=0.65, ET vs. OT ns p=0.78, ET vs. RT ns p=0.89, OT vs. RT ns p=0.99)                                                                                                                                            |
| SF 2   | c       | ET, OT, RT, NE, HC, Δ5d RT                                | 6 mice per group, except HC (7)                                         | Pooled data from 4 different batches.        | Matched, Two-way-ANOVA. Group effect: F (5, 32) = 7.21, **** p=0.0001. Group x Observed vs. Expected interaction F (4, 26) = 7.63, **** p=0.0003 | Sidak (Observed vs. expected (chance), HC group: ns p=0.99; NE group: ns p=0.74; ET group: *** p=0.0008; OT group: ** p=0.003; RT group: *** p=0.0002; Δ5d RT: ns p=0.52)                                                                                                                                                                                        |



Supplementary Table 1 (cont.)

| Figure | Panel | Groups                                                                                        | n                                             | # replications                        | Test                                                                                                                                                 | Multiple comparison                                                                                                                                                                                                |
|--------|-------|-----------------------------------------------------------------------------------------------|-----------------------------------------------|---------------------------------------|------------------------------------------------------------------------------------------------------------------------------------------------------|--------------------------------------------------------------------------------------------------------------------------------------------------------------------------------------------------------------------|
| SF2    | d     | DG: Δ0h, Δ6h, Δ12h, Δ24h                                                                      | 3 mice per group                              | Pooled data from 4 different batches. | Ordinary one-way-ANOVA. Group effect: F (3, 8) = 0.53 ns p=0.67                                                                                      | Sidak (Δ0h vs Δ6h ns p=0.99; Δ0h vs. Δ12h ns p=0.99, Δ0h vs., Δ24h ns p=0.96, Δ6h vs. Δ12h ns p=98, Δ6h vs. Δ24h ns p=0.99, Δ12h vs. Δ24h ns p=0.82                                                                |
| SF2    | d     | CA1: Δ0h, Δ6h, Δ12h, Δ24h                                                                     | 3 mice per group                              | Pooled data from 4 different batches. | Ordinary one-way-ANOVA. Group effect: F (3, 8) = 3.25 ns p=0.08                                                                                      | Sidak (Δ0h vs Δ6h ns p=0.37; Δ0h vs. Δ12h ns p=0.96, Δ0h vs., Δ24h ns p=0.58, Δ6h vs. Δ12h ns p=2, Δ6h vs. Δ24h ns p=0.06, Δ12h vs. Δ24h ns p=0.83                                                                 |
| SF5    | c     | HC vs HC + Optogenetic Reactivation                                                           | HC (n=7). HC + Opto ractivation (n=3)         | Data from 1 batch of mice             | Two-sided unpaired t test. HC overlap vs. HC overlap + Optogenetic Reactivation: *** p=0.003                                                         | NA                                                                                                                                                                                                                 |
| SF5    | e     | 594nm Light vs. No Light                                                                      | 8 mice                                        | Data from 1 batch of mice             | Matched two-way-ANOVA. Quadrant effect: F (3, 21) = 37.73, *** p<0.0001. 594nm Light x Quadrant interaction: F (1, 7) = 0.04, ns p=0.98              | Sidak (Time in Quadrant, 595nm Light vs. No Light: South ns p=0.99; East ns p>0.99; North ns p=0.99, West ns p>0.99)                                                                                               |
| SF5    | f     | 594nm Light vs. No Light                                                                      | 8 mice                                        | Data from 1 batch of mice             | Two-sided paired t test. Time in Annulus E (594 nm light vs. No Light): ns p=0.49                                                                    | NA                                                                                                                                                                                                                 |
| SF6    | b     | WM Chemogenetic Silencing                                                                     | 10 mice                                       | Data from 1 batch of mice             | Simple linear regression. R square 0.67, ** p=0.003.                                                                                                 | NA                                                                                                                                                                                                                 |
| SF6    | d     | WM Chemogenetic Silencing: Low Expression & High Expression                                   | Low Expression 6 mice, High Expression 4 mice | Data from 1 batch of mice             | Two-sided unpaired t test. Low vs. High GIDREADD-mCherry Expression: * p=0.01                                                                        | NA                                                                                                                                                                                                                 |
| SF6    | d     | WM Chemogenetic Silencing: Low Expression & High Expression                                   | Low Expression 6 mice, High Expression 4 mice | Data from 1 batch of mice             | Two-sided unpaired t test. Low vs. High GIDREADD-mCherry Expression: ** p=0.007                                                                      | NA                                                                                                                                                                                                                 |
| SF6    | e     | WM Chemogenetic Silencing: High Expression Group                                              | 4 mice                                        | Data from 1 batch of mice             | Two-sided paired t test. Vehicle vs. CNO: ns p=0.07                                                                                                  | NA                                                                                                                                                                                                                 |
| SF6    | f     | WM Chemogenetic Silencing: High Expression Group                                              | 4 mice                                        | Data from 1 batch of mice             | Two-sided paired t test. day 7 (Vehicle) vs. day 8 (CNO): ns p=0.53                                                                                  | NA                                                                                                                                                                                                                 |
| SF6    | h     | Subset of mice from the WM Chemogenetic Silencing Group to test CNO effect on cFos expression | 3 slices from 1 mouse                         | Data from 1 batch of mice             | Two-sided paired t test. Inside vs. Outside of mCherry+ regions: ns p=0.07                                                                           | NA                                                                                                                                                                                                                 |
| SF8    | a     | Δ7d OT                                                                                        | 1 mouse (example 1)                           | 3                                     | Spearman r = -0.46, CI: -0.5168 to -0.3938. **** p < 0.0001                                                                                          | NA                                                                                                                                                                                                                 |
| SF8    | a     | Δ7d OT                                                                                        | 1 mouse (example 2)                           |                                       | Spearman r = -0.25, CI: -0.2982 to -0.2075. **** p < 0.0001                                                                                          | NA                                                                                                                                                                                                                 |
| SF8    | a     | Δ7d OT                                                                                        | 1 mouse (example 3)                           |                                       | Spearman r = -0.45, CI: -0.4923 to -0.4146. **** p < 0.0001                                                                                          | NA                                                                                                                                                                                                                 |
| SF10   | c     | No stimulation, Bicuculline (BIC)                                                             | 3 slices per group                            |                                       | Unmatched, Two-way-ANOVA F (1, 1416). Region effect: **** p=0.0001. Stimulation effect **** p=0.0001. Region X Stimulation interaction **** p=0.0001 | Sidak (DG-noStim. vs. DG-BIC: **** p < 0.0001; DG-noStim. vs. CA1-noStim.: ** p = 0.006; DG-noStim. vs. CA1-BIC: **** p < 0.0001; DG-BIC vs. CA1-noStim: ****, p < 0.0001; CA1-noStim vs. CA1-BIC: **** p < 0.0001 |
| SF11   | NA    | HC                                                                                            | 1 mouse (example)                             | replicate in Fig. 8                   | Spearman r = -0.31, CI: -0.3921 to -0.2197. **** p < 0.0001                                                                                          | NA                                                                                                                                                                                                                 |
| SF11   | NA    | ST                                                                                            | 1 mouse (example)                             | replicate in Fig. 8                   | Spearman r = -0.41, CI: -0.4661 to -0.3470. **** p < 0.0001                                                                                          | NA                                                                                                                                                                                                                 |
| SF11   | NA    | DT                                                                                            | 1 mouse (example)                             | replicate in Fig. 8                   | Spearman r = -0.54, CI: -0.5944 to -0.4766. **** p < 0.0001                                                                                          | NA                                                                                                                                                                                                                 |
| SF11   | NA    | DT                                                                                            | 1 mouse (example)                             | replicate in Fig. 8                   | Spearman r = -0.55, CI: -0.6124 to -0.4814. ** p = 0.0011                                                                                            | NA                                                                                                                                                                                                                 |
| SF12   | c     | HC                                                                                            | 1 mouse (example)                             |                                       | Spearman r = -0.14, CI: -0.2122 to -0.05640. *** p = 0.0006                                                                                          | NA                                                                                                                                                                                                                 |
| SF12   | c     | HC                                                                                            | 1 mouse (example)                             |                                       | Spearman r = -0.27, CI: -0.3477 to -0.1950. **** p < 0.0001                                                                                          | NA                                                                                                                                                                                                                 |
| SF12   | c     | DT                                                                                            | 1 mouse (example)                             |                                       | Spearman r = -0.38, CI: -0.4778 to -0.2739. **** p < 0.0001                                                                                          | NA                                                                                                                                                                                                                 |
| SF12   | c     | DT                                                                                            | 1 mouse (example)                             |                                       | Spearman r = -0.19, CI: -0.2732 to -0.09618. **** p < 0.0001                                                                                         | NA                                                                                                                                                                                                                 |
| SF12   | c     | DT                                                                                            | 1 mouse (example)                             |                                       | Spearman r = -0.25, CI: -0.3341 to -0.1631. **** p < 0.0001                                                                                          | NA                                                                                                                                                                                                                 |



**Supplementary Table 2**

## Primary and secondary antibodies

| Immunogen                | Host    | Producer          | Factory#    | Dilution |
|--------------------------|---------|-------------------|-------------|----------|
| cFos                     | Rat     | Synaptic System   | 226017      | 1:1000   |
| FosB/ $\Delta$ FosB      | Rabbit  | Cell Signaling    | #2251       | 1:1000   |
| tRFP (mKate2)            | Rabbit  | Evrogen           | AB233-EV    | 1:1000   |
| GFP                      | Chicken | Invitrogen        | A10262      | 1:1000   |
| Anti-Campari2 red (4F61) | Rabbit  | Absolute Antibody | AB1649-23.0 | 1:1000   |
| FosB                     | Rabbit  | Thermofisher      | PA5-79280   | 1:300    |
| FosB/ $\Delta$ FosB      | Mouse   | Abcam             | Ab11959     | 1:300    |

| Immunogen/label | Host | Producer   | Factory# | Dilution |
|-----------------|------|------------|----------|----------|
| Rabbit-488      | Goat | Invitrogen | A11008   | 1:1000   |
| Rabbit-568      | Goat | Invitrogen | A11011   | 1:1000   |
| Chicken-488     | Goat | Invitrogen | A11039   | 1:1000   |
| Rabbit-647      | Goat | Invitrogen | A27040   | 1:1000   |
| Rat-647         | Goat | Invitrogen | A21247   | 1:1000   |
| Mouse-488       | Goat | Invitrogen | A11029   | 1:1000   |
| Mouse-405       | Goat | Invitrogen | A31553   | 1:1000   |
